# Supplementary material
Source: publisher figshare collection journal article supplement (https://rs.figshare.com/ndownloader/files/14513222)
Supplement: Supplementary file 1 [file 14513222]

## Sheet: Sheet1
Species name	Association	Demersal type
Acanthopagrus_australis	1	1
Alepes_djedaba	1	1
Alepes_kleinii	0	1
Aluterus_monoceros	1	1
Aluterus_scriptus	0	1
Anoplopoma_fimbria	0	1
Atule_mate	1	1
Auxis_rochei_rochei	0	0
Auxis_thazard_thazard	0	0
Balistes_capriscus	0	1
Balistes_polylepis	0	1
Boops_boops	0	1
Brosme_brosme	1	1
Canthidermis_maculata	0	1
Carangoides_bartholomaei	1	1
Carangoides_equula	1	1
Carangoides_malabaricus	1	1
Caranx_caballus	0	0
Caranx_caninus	0	0
Caranx_crysos	1	1
Caranx_hippos	1	1
Caranx_melampygus	1	1
Centrolophus_niger	1	0
Chaetodipterus_faber	1	1
Chloroscombrus_chrysurus	1	0
Ciliata_mustela	0	1
Ciliata_septentrionalis	0	1
Cubiceps_gracilis	1	0
Decapterus_kurroides	0	1
Decapterus_maruadsi	1	1
Diplodus_puntazzo	0	1
Epinephelus_areolatus	0	1
Euthynnus_affinis	0	0
Gadus_macrocephalus	1	1
Gadus_morhua	1	1
Gadus_ogac	0	1
Gaidropsarus_mediterraneus	0	1
Girella_nigricans	1	1
Girella_punctata	0	1
Gnathanodon_speciosus	1	1
Hemicaranx_zelotes	1	1
Hippocampus_abdominalis	0	1
Hippocampus_erectus	0	1
Hippocampus_zosterae	1	1
Icichthys_lockingtoni	1	0
Icosteus_aenigmaticus	1	0
Katsuwonus_pelamis	0	0
Leuroglossus_stilbius	1	0
Liza_argentea	0	1
Lutjanus_lutjanus	0	1
Macroramphosus_scolopax	1	1
Melanogrammus_aeglefinus	1	1
Merlangius_merlangus	1	1
Merluccius_albidus	0	1
Merluccius_australis	0	1
Merluccius_bilinearis	1	1
Merluccius_polli	0	1
Microgadus_tomcod	0	1
Micromesistius_poutassou	0	0
Mola_mola	0	0
Mullus_surmuletus	0	1
Naucrates_ductor	1	1
Ocyurus_chrysurus	0	1
Oplegnathus_fasciatus	1	1
Oplegnathus_punctatus	0	1
Pagellus_acarne	0	1
Pagrus_pagrus	0	1
Parablennius_sanguinolentus	0	1
Parablennius_tentacularis	0	1
Paralabrax_clathratus	0	1
Peprilus_simillimus	1	1
Peprilus_triacanthus	1	1
Pholis_nebulosa	0	1
Pollachius_pollachius	1	1
Pollachius_virens	0	1
Polyprion_americanus	0	1
Pomatomus_saltatrix	0	0
Pristigenys_alta	0	1
Psenes_arafurensis	1	0
Psenes_cyanophrys	1	0
Psenes_maculatus	1	0
Psenes_pellucidus	1	0
Psenopsis_anomala	1	1
Pseudocaranx_dentex	1	1
Rachycentron_canadum	0	1
Rhabdosargus_sarba	1	1
Schedophilus_medusophagus	1	0
Schedophilus_ovalis	1	1
Schedophilus_velaini	0	0
Scomber_scombrus	0	0
Sebastes_caurinus	0	1
Sebastes_inermis	0	1
Sebastes_thompsoni	0	1
Sebastes_vulpes	0	1
Selaroides_leptolepis	1	1
Seriola_lalandi	0	1
Seriola_rivoliana	0	1
Seriola_zonata	1	1
Seriolella_brama	1	1
Seriolina_nigrofasciata	0	1
Sphyraena_argentea	0	0
Sphyraena_barracuda	0	1
Stenobrachius_leucopsarus	1	0
Stenobrachius_nannochir	0	0
Stephanolepis_hispidus	1	1
Stigmatopora_argus	0	1
Stromateus_fiatola	1	1
Stromateus_stellatus	0	1
Syngnathus_floridae	0	1
Syngnathus_typhle	0	1
Tetragonurus_cuvieri	1	0
Thamnaconus_modestus	1	1
Theragra_chalcogramma	1	1
Thunnus_alalunga	0	0
Thunnus_albacares	0	0
Thunnus_thynnus	0	0
Trachurus_declivis	1	1
Trachurus_japonicus	1	0
Trachurus_lathami	1	1
Trachurus_mediterraneus	1	0
Trachurus_murphyi	0	0
Trachurus_novaezelandiae	1	0
Trachurus_picturatus	0	1
Trachurus_symmetricus	1	0
Trachurus_trachurus	1	0
Urophycis_chuss	1	1
Urophycis_regia	0	1
Urophycis_tenuis	0	1
Xiphias_gladius	0	0
Zaprora_silenus	1	1

## Sheet: Sheet2
		Unravelling the macro-evolutionary ecology of fish-jellyfish associations: life in the ‘gingerbread house’
		Donal C. Griffina, Chris Harrodb,c, Jonathan D.R. Houghtona, Isabella Capellinid, e
Analyses data file
	Column title	Description
Column A	Species name	Names of fish species included in our analyses
Column B	Association	1 - indicating the fish displays jellyfish assocation behaviour. 0 - indicates fish species does not display jellyfish associative behaviour
Column C	Demersal type	1 - indicating the fish is benthic, benthopelagic or reef associating. 0 - indicates fish species is fully pelagic living
Jellyfish association analyses data set. Includes information on whether each species displays jellyfish association behaviour, and whether each fish is a demersal type (benthic, benthopelagic or reef-associated) or fully pelagic living. This data set was used to carry out the ancestral state reconstruction and the correlated evolution analyses in this research paper.
